# Supplementary material for: IL-1beta promotes the age-associated decline of beta cell function
Source: PubMed Central journal article supplement — iScience. 2021 Oct 9;24(11):103250. doi: 10.1016/j.isci.2021.103250 (PMC8554531; doi:10.1016/j.isci.2021.103250), 2021-10-09
Supplement: mmc1.pdf [file mmc1.pdf]

**iScience, Volume 24**

**Supplemental information**

**IL-1beta promotes the age-associated  
decline of beta cell function**

**Marianne Böni-Schnetzler, Hélène Méreau, Leila Rachid, Sophia J. Wiedemann, Friederike Schulze, Kelly Trimigliozzi, Daniel T. Meier, and Marc Y. Donath**

## Figure S1

### S1a

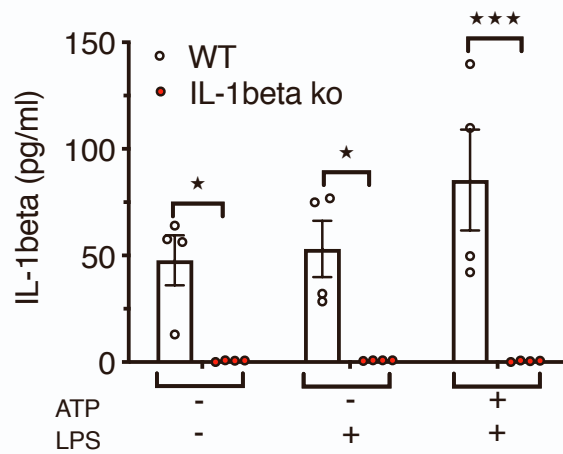

### S1b

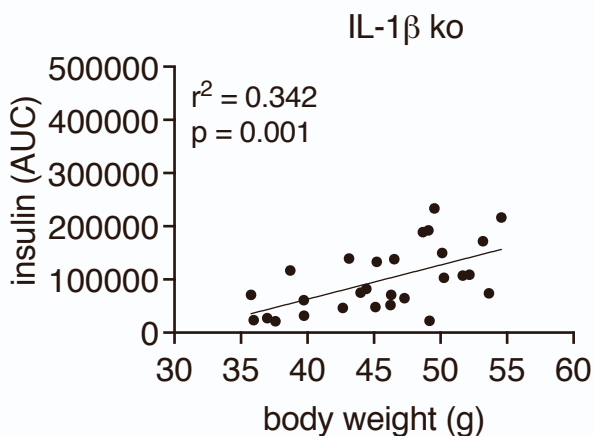

### S1c

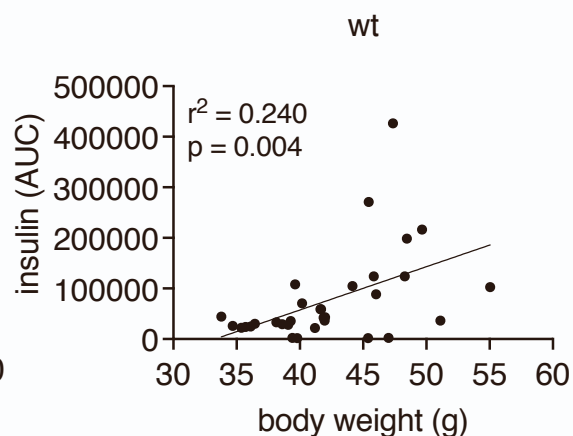

**Figure S1. Related to Figure 3: IL-1beta secretion in cultured peritoneal cells from IL-1beta ko mice and correlations of insulin secretion in ipGTT with body weight in 52-week-old IL-1beta ko and control mice**

**(S1a)** IL-1beta concentrations in culture supernatants of pools of adherent peritoneal cells from 3 wt mice and 3 IL-1beta ko mice with or without treatment with 100 ng/ml of LPS and a combination of LPS and 5 mM ATP (n=4 replicates). Statistics: two-way ANOVA and Sidak's multiple comparison test; error bars represent SEM; wt versus ko: \*P < 0.05, \*\*\*P < 0.001.

**(S1b,c)** Positive correlations of insulin area under the curve (AUC) during 30 minutes after the glucose bolus during an ipGTT with body weight in IL-1beta ko mice (b) and littermate wt control mice (c).

Figure S2

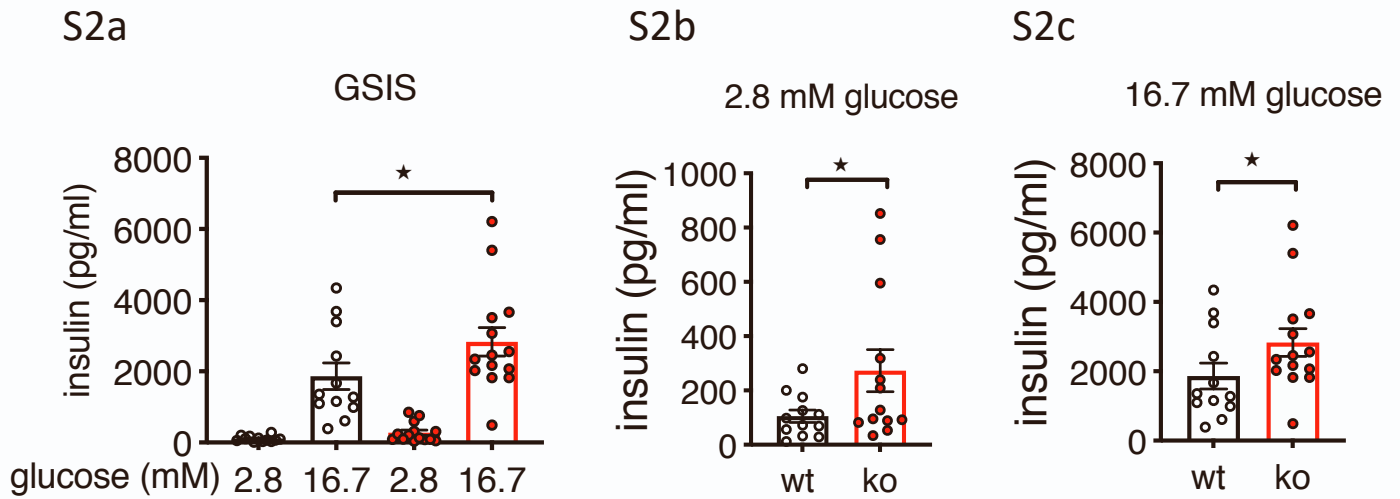

**Figure S2. Related to Figure 4: Glucose-stimulated insulin secretion (GSIS) in isolated islets from IL-1beta ko and control mice (raw data)**

GSIS of isolated islets of 52-weeks-old IL-1beta ko (red) and littermate wt control (black) mice, data expressed as mean per mouse:

**(S2a)** 1h insulin secretion of 10 islet in 1 ml (mean of 3-4 biological replicates per mouse, n=12 wt and n=13-14 ko mice).

**(S2b)** Comparison of 1h insulin secretion at 2.8 mM glucose in islets from ko and wt mice.

**(S2c)** Comparison of 1h insulin secretion at 16.7 mM glucose in islets from ko and wt mice.

Statistics: S2a; two-way ANOVA and Sidak's multiple comparison test, S2b,c; Student's t-test, error bars represent SEM, \*P<0.05, \*\*P<0.01.

## Figure S3

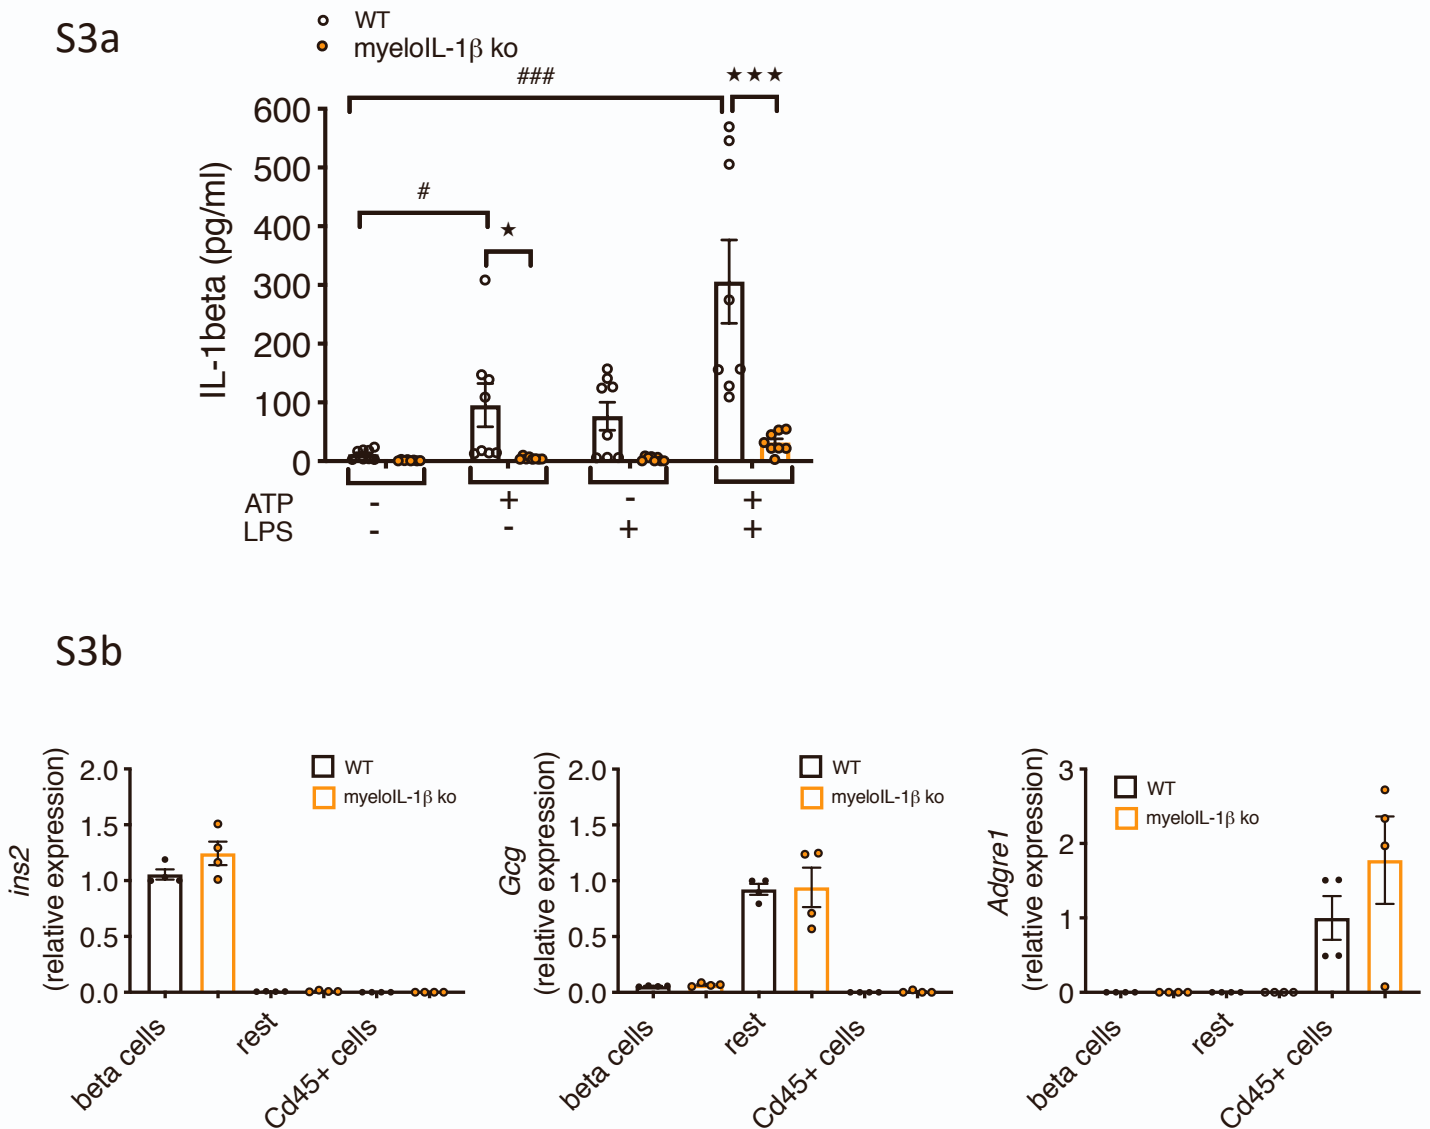

**Figure S3. Related to Figure 5: IL-1beta secretion in cultured peritoneal cells from myelolL-1beta ko mice and FACS fractions controls of islet cell fractions from myelolL-1beta ko and littermate wt mice**

**(S3a)** IL-1beta concentrations in culture supernatants of pools of adherent peritoneal cell from 4 wt mice and 5 myelolL-1beta ko mice with or without treatment with 100 ng/ml LPS and a with and without 5 mM ATP (n=8 replicates). Statistics: two-way ANOVA and Sidak's multiple comparison test; error bars represent SEM; wt versus ko: \*P<0.05, \*\*P<0.01, \*\*\*P<0.001; comparison between treatments: #P<0.05, ###P<0.001

**(S3b)** Relative gene expression in FACS-isolated beta cell fractions, rest cell fractions and CD45+ pan-immune cell fractions (n=4, cells from 2 mice were pooled per data point). Statistics: Error bars represent SEM.

## Figure S4

### S4a

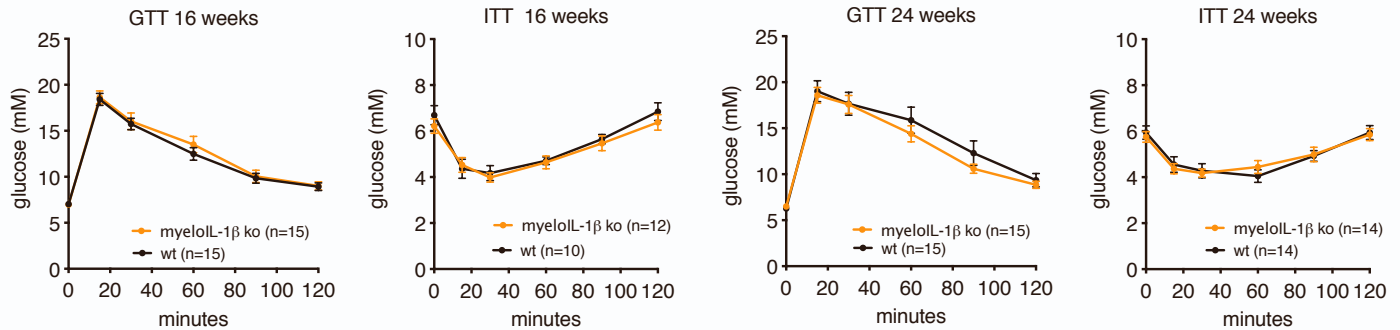

### S4b

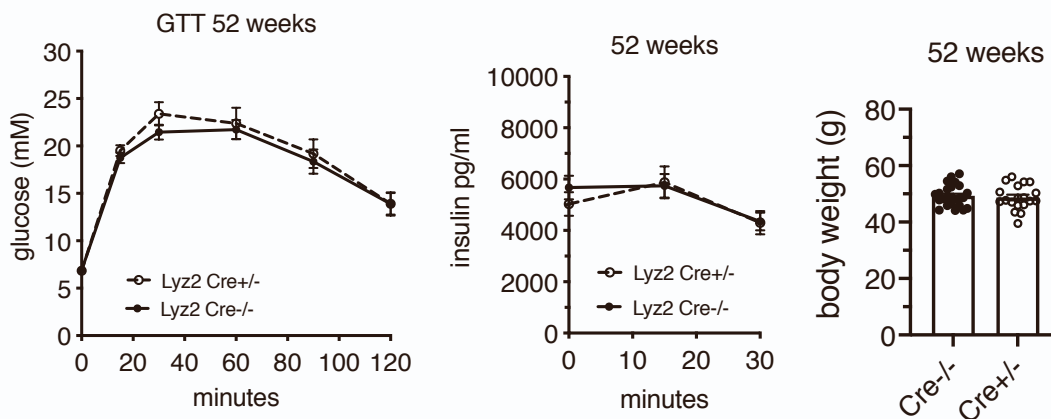

**Figure S4. Related to Figure 5: ipGTT and ipITT of a trajectory of myelolL-1beta ko and wt littermate control mice and ipGTT and insulin secretion in 52-week-old Lyz2 Cre<sup>+/-</sup> and littermate controls (Lyz2 Cre<sup>-/-</sup>)**

**(S4a)** IpGTT and ipITT of the same mice from 2 separate cohorts followed over time; myelolL-1beta ko mice (orange) and littermate controls (black), 52-weeks time points and corresponding insulin values see Fig. 3C-G. Statistics: error bars represent SEM.

**(S4b)** Blood glucose concentrations during ipGTT (A) and plasma insulin concentration (B) of Lyz2 Cre<sup>+/-</sup> only mice (n=23) and littermate Lyz2 Cre<sup>-/-</sup> mice (n=27). C: body weight at 52 weeks of age. Statistics: error bars represent SEM.

Figure S5

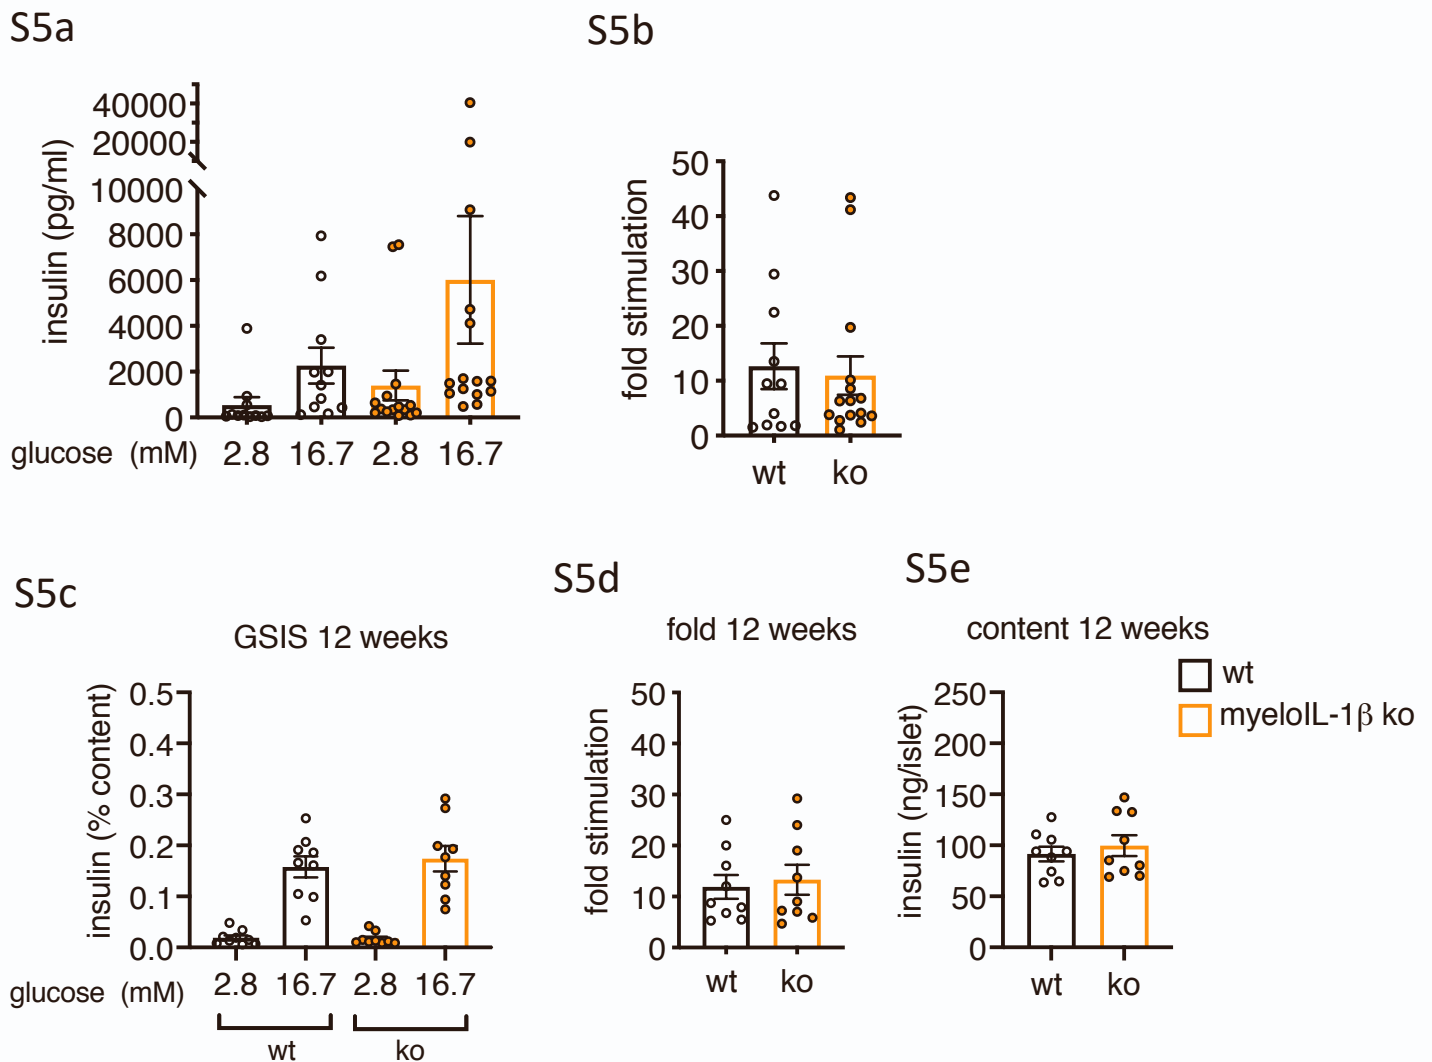

**Figure S5. Related to Figure 6: GSIS of islets from 12- and 52-week-old myelolL-1 $\beta$  ko and wt littermates**

**(S5a,b)** GSIS (a) of isolated islets of 52-weeks-old IL-1 $\beta$  ko (orange) and littermate wt control (black) mice, raw data expressed as mean per mouse (3-4 replicates per mouse) and (b) fold stimulation of mean insulin at 2.8 and 17.6 mM glucose expressed per mouse.

**(S5c-e)** GSIS (c) of isolated islets of 12-weeks-old IL-1 $\beta$  ko (orange) and littermate wt control (black) mice, data expressed as mean % of the content per mouse (3-4 replicates per mouse, n=9 myelolL-1 $\beta$  ko mice, n=9 control mice); (d) fold stimulation (ratio of insulin secretion at 16.7 to 2.8 mM glucose); (e) mean islet insulin content per mouse.

Figure S6

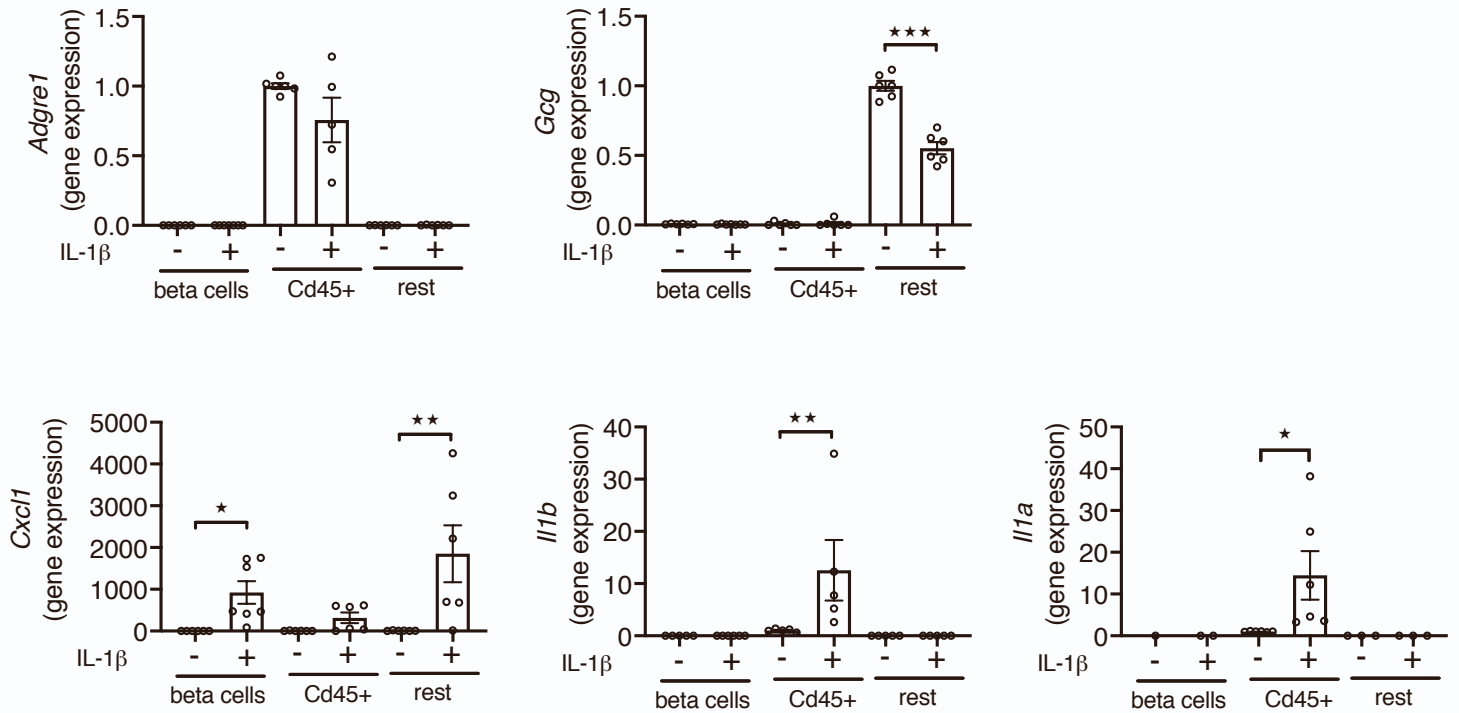

**Figure S6. Related to Figure 6: Gene expression in FACS-isolated islet cell fractions from islets treated with or without IL-1beta *in vitro***

Gene expression in FACS-isolated islet cell fractions from islets isolated from EYFP beta cell reporter mice and treated with or without 1ng/ml IL-1beta for 16 hours (n=4-7 FACS isolations, islet pools of 2 mice per FACS isolation). Statistics: one-way ANOVA and Sidak's multiple comparison test; error bars represent SEM, \*P<0.05, \*\*P<0.01, \*\*\*P<0.001.
